# Supplementary material for: Estimating the Risk of Human Herpesvirus 6 and Cytomegalovirus Transmission to Ugandan Infants from Viral Shedding in Saliva by Household Contacts
Source: PubMed Central journal article supplement (PMC7077293; doi:10.3390/v12020171), 2020-02-03
Supplement: viruses-12-00171-s001.pdf [file viruses-12-00171-s001.pdf]

**Table S1.** Total observed and interpolated exposures by virus and exposure source.

| Virus | Total exposure weeks | Exposure source    | Total weeks observed | Total weeks interpolated (%) |
|-------|----------------------|--------------------|----------------------|------------------------------|
| HHV-6 | 684                  | Secondary Children | 544                  | 140 (20.5)                   |
|       |                      | Mother             | 646                  | 38 (5.6)                     |
| CMV   | 819                  | Secondary Children | 647                  | 172 (21.0)                   |
|       |                      | Mother             | 767                  | 52 (6.3)                     |

**Table S2.** Spearman correlations and p-values for exposure outcomes (percent positive swab and summarized viral loads (VL, DNA copies/mL)) between secondary children and mothers within a household.

| Virus | Endpoint      | Spearman correlation (95% CI) | P-value |
|-------|---------------|-------------------------------|---------|
| HHV-6 | Pct. Positive | 0.30 (-0.06, 0.59)            | 0.095   |
|       | Mean VL       | 0.33 (-0.03, 0.61)            | 0.074   |
|       | Maximum VL    | 0.29 (-0.07, 0.59)            | 0.111   |
| CMV   | Pct. Positive | -0.04 (-0.40, 0.32)           | 0.818   |
|       | Mean VL       | 0.06 (-0.31, 0.41)            | 0.752   |
|       | Maximum VL    | 0.06 (-0.31, 0.41)            | 0.768   |

**Table S3:** Comparison of exposure outcomes (percent positive swab and summarized viral loads (VL, DNA copies/mL)) by exposure source (secondary children, mothers, and household sum) between households by infant transmission status. Significant differences ( $p < 0.05$ ) are bolded.

| Virus | Endpoint                | Exposure source    | Household transmission | No household transmission | Difference | P-value <sup>2</sup> |
|-------|-------------------------|--------------------|------------------------|---------------------------|------------|----------------------|
| HHV-6 | Pct. Positive           | Secondary Children | 100.00                 | 94.50                     | 5.50       | <b>0.003</b>         |
|       |                         | Mother             | 76.00                  | 40.06                     | 35.94      | 0.105                |
|       |                         | Household Sum      | 100.00                 | 98.91                     | 1.09       | <b>0.008</b>         |
|       | Mean VL <sup>1</sup>    | Secondary Children | 4.08                   | 3.07                      | 1.00       | <b>0.007</b>         |
|       |                         | Mother             | 2.02                   | 1.05                      | 0.97       | 0.102                |
|       |                         | Household Sum      | 4.12                   | 3.41                      | 0.71       | <b>0.006</b>         |
|       | Maximum VL <sup>1</sup> | Secondary Children | 4.63                   | 3.68                      | 0.95       | <b>0.020</b>         |
|       |                         | Mother             | 3.34                   | 3.00                      | 0.34       | 0.147                |
|       |                         | Household Sum      | 4.63                   | 3.90                      | 0.72       | <b>0.016</b>         |
| CMV   | Pct. Positive           | Secondary Children | 100.00                 | 94.05                     | 5.95       | 0.230                |
|       |                         | Mother             | 5.41                   | 2.18                      | 3.22       | 0.622                |
|       |                         | Household Sum      | 100.00                 | 95.30                     | 4.70       | 0.249                |
|       | Mean VL <sup>1</sup>    | Secondary Children | 3.46                   | 3.05                      | 0.41       | 0.179                |
|       |                         | Mother             | 0.13                   | 0.05                      | 0.08       | 0.684                |
|       |                         | Household Sum      | 3.47                   | 3.05                      | 0.42       | 0.179                |
|       | Maximum VL <sup>1</sup> | Secondary Children | 4.42                   | 4.34                      | 0.08       | 0.377                |
|       |                         | Mother             | 1.11                   | 2.49                      | -1.38      | 0.653                |
|       |                         | Household Sum      | 4.43                   | 4.34                      | 0.09       | 0.400                |

<sup>1</sup>Viral load, DNA copies/mL.

<sup>2</sup>Exact Wilcoxon rank sum test

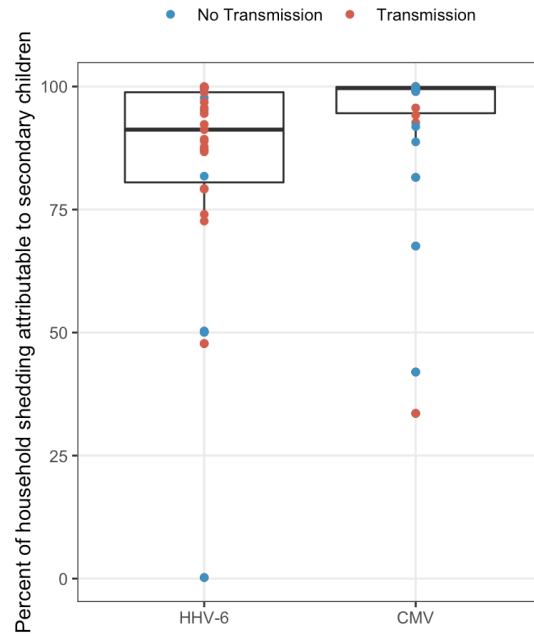

**Figure S1.** Composition of household sum viral load. Secondary household children comprise the majority of the summed household exposure measure compared to mothers. Percent of the weekly household sum exposure comprised by the secondary children viral load averaged over the exposure period. Boxes represent interquartile range; stems represent values within 1.5 of the IQR.

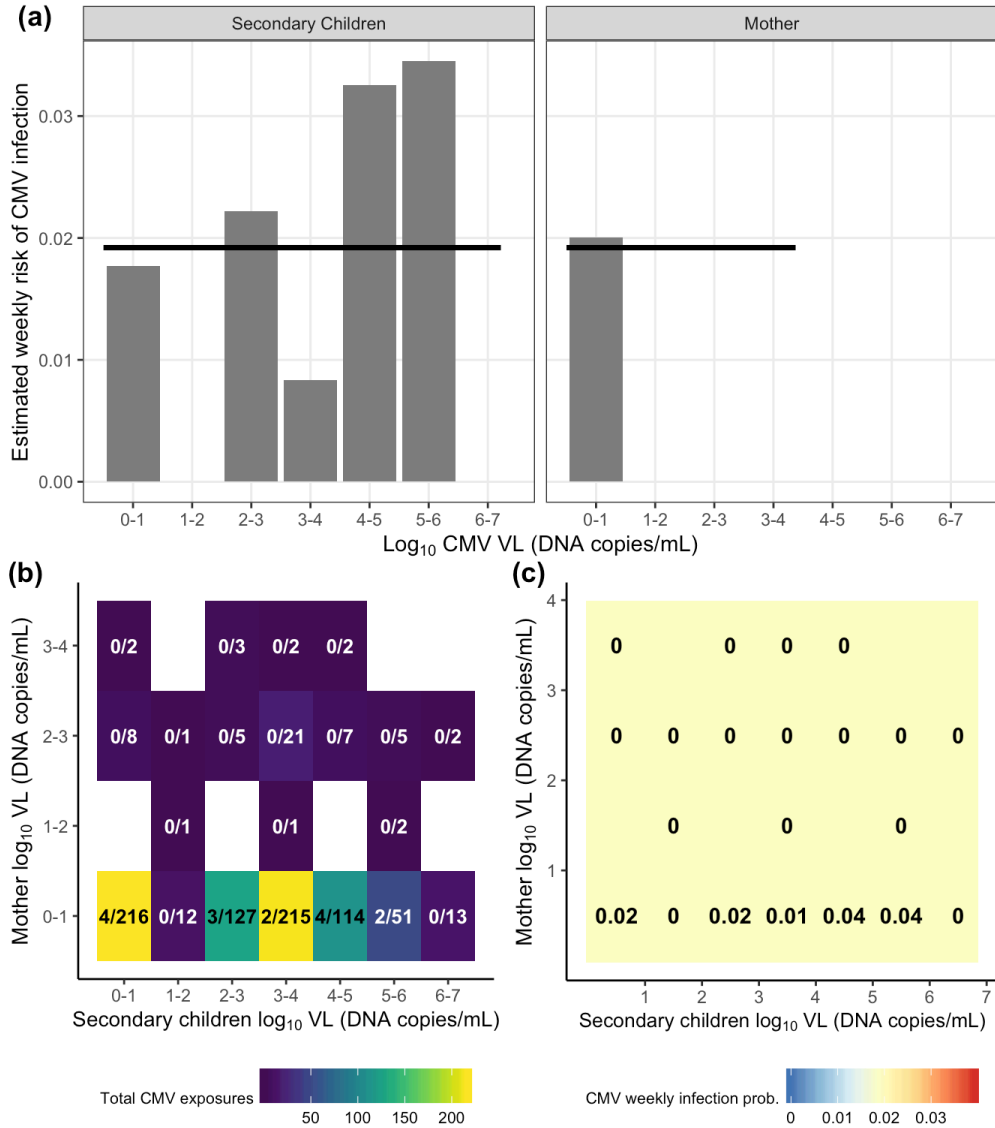

**Figure S2:** Estimation of CMV acquisition risk from exposures by week using the combined exposure model (Tables 2 and B1). (a) Individual CMV dose-response relationship for mother and secondary children oral viral load (VL) exposures where bars depict the percentage of infections observed among total exposures in the data and lines depict estimated risk from the model. (b) Heatmap depicting distribution of total combined exposures in a given viral load bin from mothers and secondary children in a household. Text depicts fraction of total infections over total exposures. (c) Heatmap depicting risk of CMV infection from combined household mother and secondary children exposures estimated from the model. Text depicts proportion of infections observed in the data using binned viral loads from (b) (equivalent to fraction displayed).
